# Supplementary material for: Unexpectedly complex gradation of coral population structure in the Nansei Islands, Japan
Source: PubMed Central journal article supplement (PMC4984520; doi:10.1002/ece3.2296), 2016-07-12

**Appendix S1.** Three combinations of multiplex primer sets developed for this study with fluorescent tails and tagged primers.

|              | Tag    |         |         |
|--------------|--------|---------|---------|
|              | 6-FAM  | CAG     | T7      |
| combination1 | 441m6  | 12406m3 | 11543m5 |
| combination2 | 8346m3 | 7961m4  | 12130m5 |
| combination3 | 530m4  | 11292m4 | 11745m3 |

Appendix S2. Estimated frequencies of null alleles with significant values in bold.

|         | Ayamaru      | Kuninao      | Sesoko       | Maeda        | Kume         | Isa          | Chibishi     | Ikema        | Shigira      | Hirakubo     | Nakano       | Taketomi     | Amitori      | Kuroshima    | Haemida      |
|---------|--------------|--------------|--------------|--------------|--------------|--------------|--------------|--------------|--------------|--------------|--------------|--------------|--------------|--------------|--------------|
| 8346m3  | 0.006        | 0.083        | -0.119       | -0.069       | -0.064       | 0.108        | 0.020        | 0.021        | 0.149        | 0.016        | 0.016        | 0.091        | 0.019        | -0.001       | <b>0.205</b> |
| 7961m4  | <b>0.304</b> | <b>0.392</b> | <b>0.306</b> | <b>0.437</b> | <b>0.439</b> | <b>0.329</b> | <b>0.301</b> | <b>0.194</b> | -0.103       | <b>0.349</b> | <b>0.237</b> | <b>0.411</b> | <b>0.294</b> | <b>0.273</b> | <b>0.387</b> |
| 11745m3 | -0.063       | -0.067       | -0.038       | 0.036        | 0.060        | 0.046        | -0.019       | 0.030        | -0.040       | -0.012       | <b>0.073</b> | -0.001       | 0.378        | 0.051        | -0.065       |
| 12406m3 | 0.072        | 0.097        | -0.126       | 0.009        | 0.000        | 0.101        | -0.009       | -0.031       | -0.065       | -0.067       | 0.032        | -0.093       | -0.071       | 0.070        | 0.027        |
| 11543m5 | -0.115       | -0.294       | -0.138       | 0.207        | 0.077        | -0.134       | 0.187        | 0.160        | -0.005       | <b>0.240</b> | <b>0.193</b> | 0.054        | -0.097       | 0.207        | 0.000        |
| 530m4   | -0.179       | -0.124       | 0.044        | -0.264       | 0.035        | -0.044       | <b>0.250</b> | -0.100       | -0.368       | 0.050        | 0.022        | 0.022        | 0.041        | -0.168       | 0.040        |
| 11401m4 | -0.072       | -0.040       | -0.039       | <b>0.182</b> | -0.022       | 0.080        | 0.014        | -0.191       | -0.105       | 0.027        | 0.043        | -0.189       | 0.093        | -0.084       | 0.031        |
| 441m6   | 0.029        | -0.012       | -0.061       | <b>0.226</b> | -0.147       | -0.228       | 0.180        | -0.027       | 0.086        | <b>0.106</b> | 0.031        | -0.018       | 0.005        | 0.111        | -0.122       |
| 11292m4 | 0.097        | <b>0.195</b> | 0.108        | 0.084        | 0.074        | -0.030       | 0.057        | 0.025        | <b>0.257</b> | <b>0.156</b> | <b>0.138</b> | <b>0.258</b> | 0.056        | -0.260       | -0.026       |
| 8499m4  | -0.177       | -0.409       | -0.388       | 0.159        | -0.236       | 0.000        | -0.045       | -0.499       | -0.344       | -0.101       | -0.232       | -0.060       | -0.275       | 0.041        | -0.251       |
| 7203m5  | 0.136        | 0.132        | -0.073       | 0.068        | 0.027        | 0.119        | <b>0.205</b> | 0.037        | 0.079        | -0.028       | -0.063       | 0.002        | <b>0.117</b> | 0.137        | 0.132        |
| 12130m5 | -0.184       | 0.001        | -0.370       | -0.440       | -0.087       | -0.293       | -0.263       | -0.119       | -0.215       | -0.172       | 0.008        | -0.129       | -0.054       | -0.065       | 0.041        |
| 4546m2  | <b>0.273</b> | <b>0.282</b> | <b>0.170</b> | <b>0.236</b> | 0.029        | 0.155        | <b>0.270</b> | <b>0.234</b> | <b>0.288</b> | <b>0.243</b> | <b>0.105</b> | <b>0.268</b> | <b>0.142</b> | <b>0.209</b> | 0.096        |

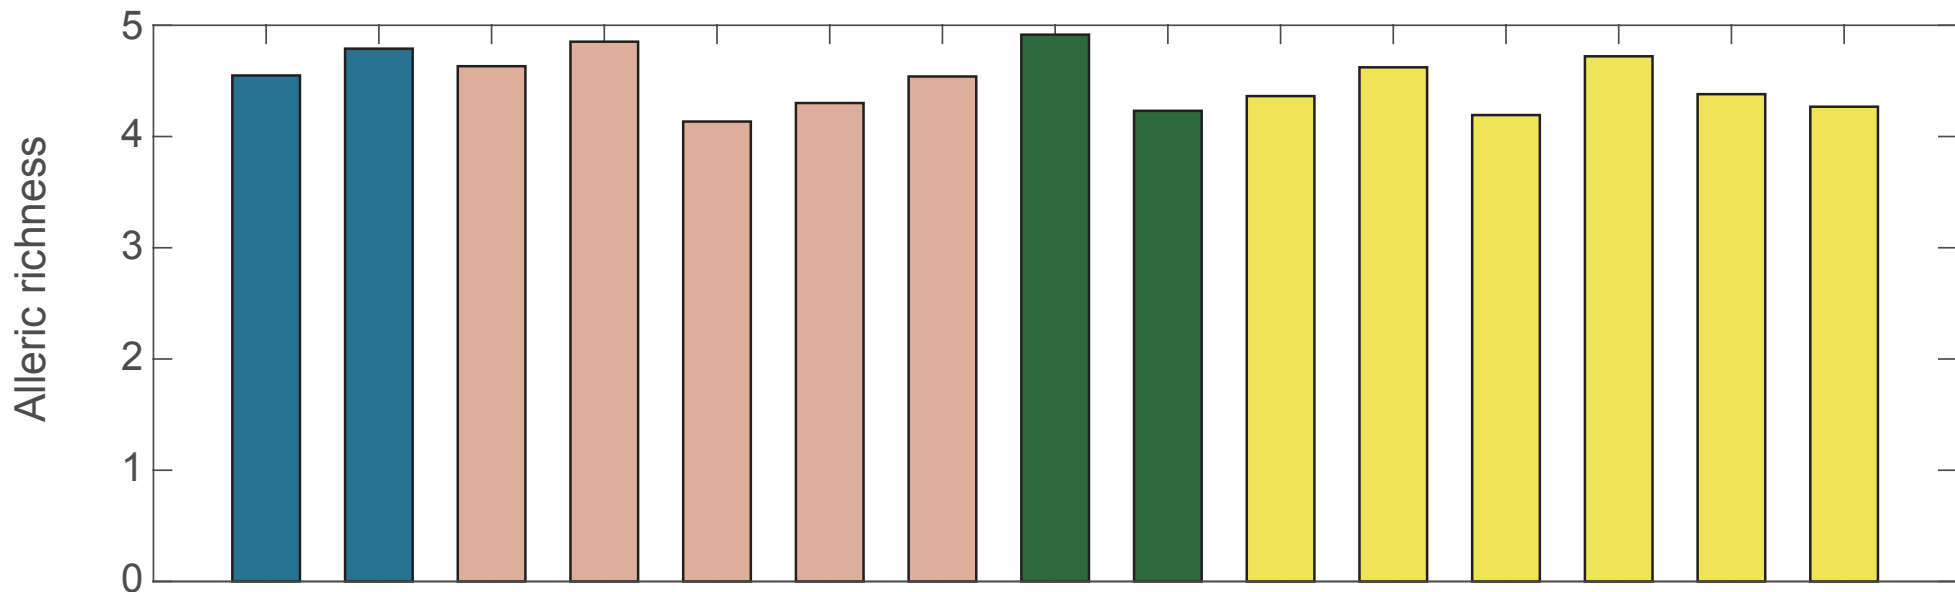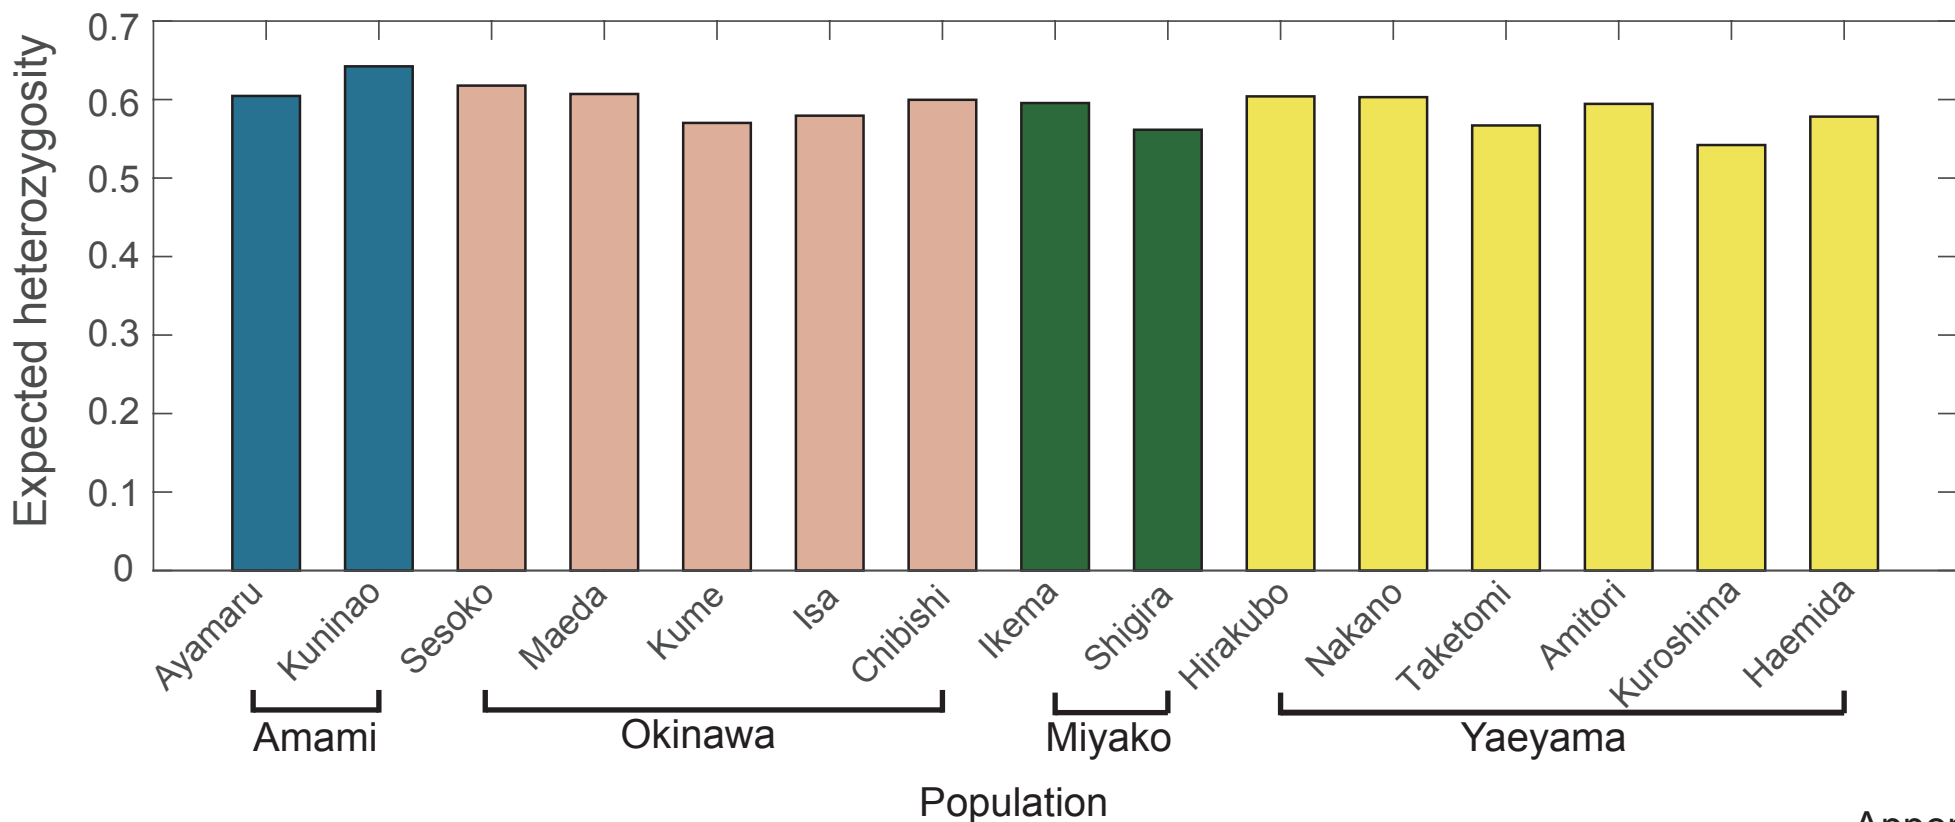

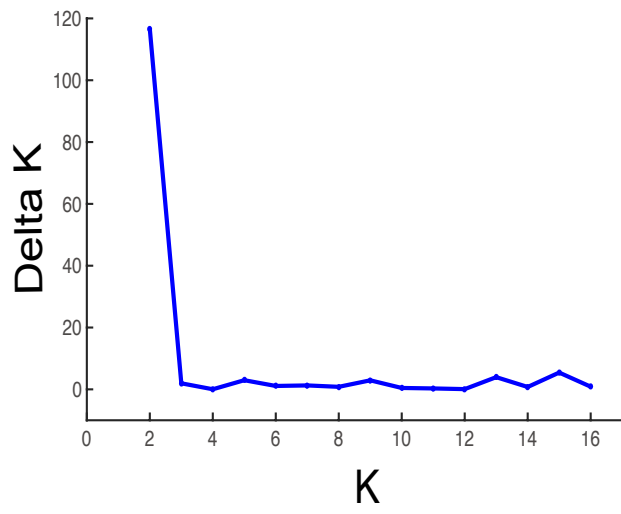

Appendix S4

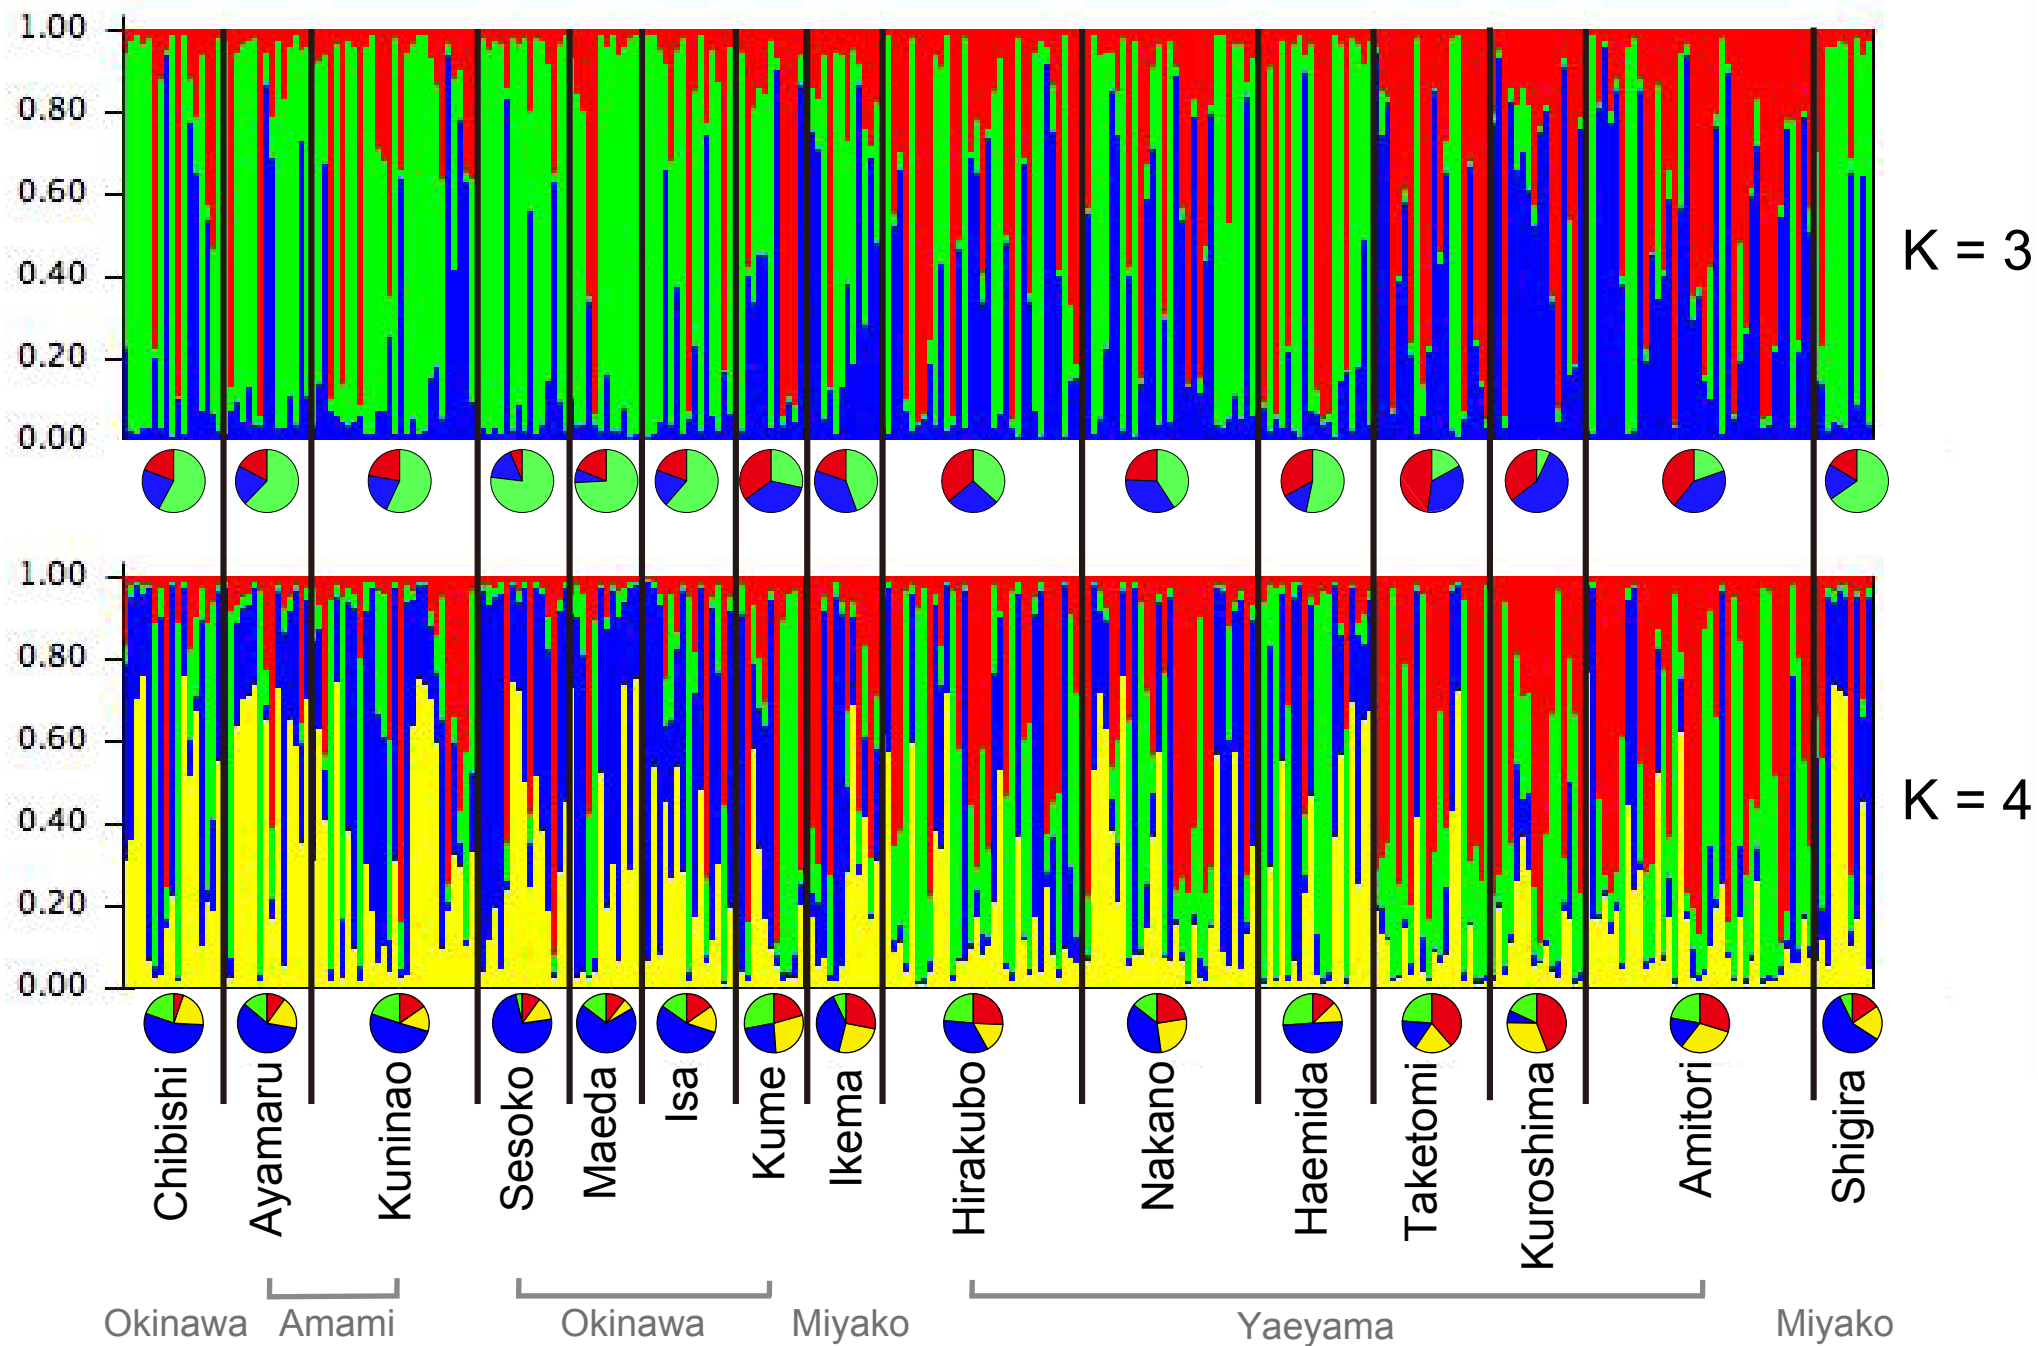

**Appendix S6.** Analysis of molecular variance (AMOVA) for multilocus pairwise  $F_{ST}$  estimates for 13 microsatellite loci from *Acropora tenuis*.

| Chibishi | Ayamaru | Kuninao | Sesoko | Maeda | Isa          | Kume         | Ikema        | Hirakubo     | Nakano       | Haemida      | Taketomi     | Kuroshima    | Amitori      | Shigira      |           |
|----------|---------|---------|--------|-------|--------------|--------------|--------------|--------------|--------------|--------------|--------------|--------------|--------------|--------------|-----------|
| 0.004    | 0.269   | 0.422   | 0.148  | 0.446 | 0.344        | 0.120        | 0.165        | 0.171        | 0.141        | 0.432        | <b>0.009</b> | <b>0.001</b> | <b>0.001</b> | <b>0.024</b> | Chibishi  |
| 0.000    | 0.000   | 0.447   | 0.425  | 0.068 | <b>0.030</b> | <b>0.014</b> | 0.446        | 0.106        | 0.095        | 0.322        | <b>0.002</b> | <b>0.001</b> | <b>0.001</b> | 0.104        | Ayamaru   |
| 0.008    | 0.000   | 0.008   | 0.116  | 0.209 | <b>0.014</b> | <b>0.006</b> | <b>0.035</b> | <b>0.015</b> | <b>0.008</b> | <b>0.016</b> | <b>0.001</b> | <b>0.001</b> | <b>0.001</b> | 0.436        | Sesoko    |
| 0.000    | 0.015   | 0.006   | 0.007  |       | 0.241        | <b>0.047</b> | <b>0.044</b> | <b>0.021</b> | <b>0.007</b> | 0.140        | <b>0.001</b> | <b>0.001</b> | <b>0.001</b> | 0.137        | Maeda     |
| 0.002    | 0.017   | 0.019   | 0.023  | 0.006 |              | 0.158        | 0.446        | 0.076        | 0.066        | 0.439        | <b>0.012</b> | <b>0.001</b> | <b>0.002</b> | <b>0.037</b> | Isa       |
| 0.011    | 0.028   | 0.021   | 0.037  | 0.019 | 0.010        |              | 0.435        | 0.349        | 0.080        | 0.269        | 0.254        | <b>0.044</b> | <b>0.038</b> | <b>0.022</b> | Kume      |
| 0.008    | 0.000   | 0.018   | 0.019  | 0.019 | 0.000        | 0.000        |              | 0.305        | 0.403        | 0.459        | 0.100        | <b>0.003</b> | <b>0.004</b> | 0.061        | Ikema     |
| 0.005    | 0.008   | 0.008   | 0.017  | 0.018 | 0.009        | 0.001        | 0.003        |              | 0.071        | 0.453        | 0.179        | <b>0.006</b> | <b>0.002</b> | <b>0.007</b> | Hirakubo  |
| 0.006    | 0.010   | 0.014   | 0.020  | 0.027 | 0.009        | 0.012        | 0.000        | 0.006        |              | <b>0.046</b> | 0.058        | <b>0.019</b> | <b>0.005</b> | <b>0.023</b> | Nakano    |
| 0.000    | 0.003   | 0.002   | 0.021  | 0.009 | 0.000        | 0.004        | 0.000        | 0.000        | 0.010        |              | 0.086        | <b>0.002</b> | <b>0.002</b> | <b>0.009</b> | Haemida   |
| 0.029    | 0.034   | 0.026   | 0.057  | 0.053 | 0.023        | 0.005        | 0.012        | 0.005        | 0.010        | 0.009        |              | 0.445        | 0.133        | <b>0.001</b> | Taketomi  |
| 0.056    | 0.054   | 0.050   | 0.079  | 0.075 | 0.047        | 0.018        | 0.032        | 0.018        | 0.018        | 0.036        | 0.000        |              | <b>0.022</b> | <b>0.001</b> | Kuroshima |
| 0.036    | 0.039   | 0.024   | 0.057  | 0.062 | 0.038        | 0.015        | 0.025        | 0.018        | 0.016        | 0.030        | 0.006        | 0.015        |              | <b>0.001</b> | Amitori   |
| 0.023    | 0.015   | 0.024   | 0.000  | 0.013 | 0.024        | 0.032        | 0.017        | 0.026        | 0.023        | 0.031        | 0.065        | 0.077        | 0.062        |              | Shigira   |

$F_{ST}$  values are under diagonal. P-values are above diagonal and boldfaced values are significant ( $P < 0.05$ ).

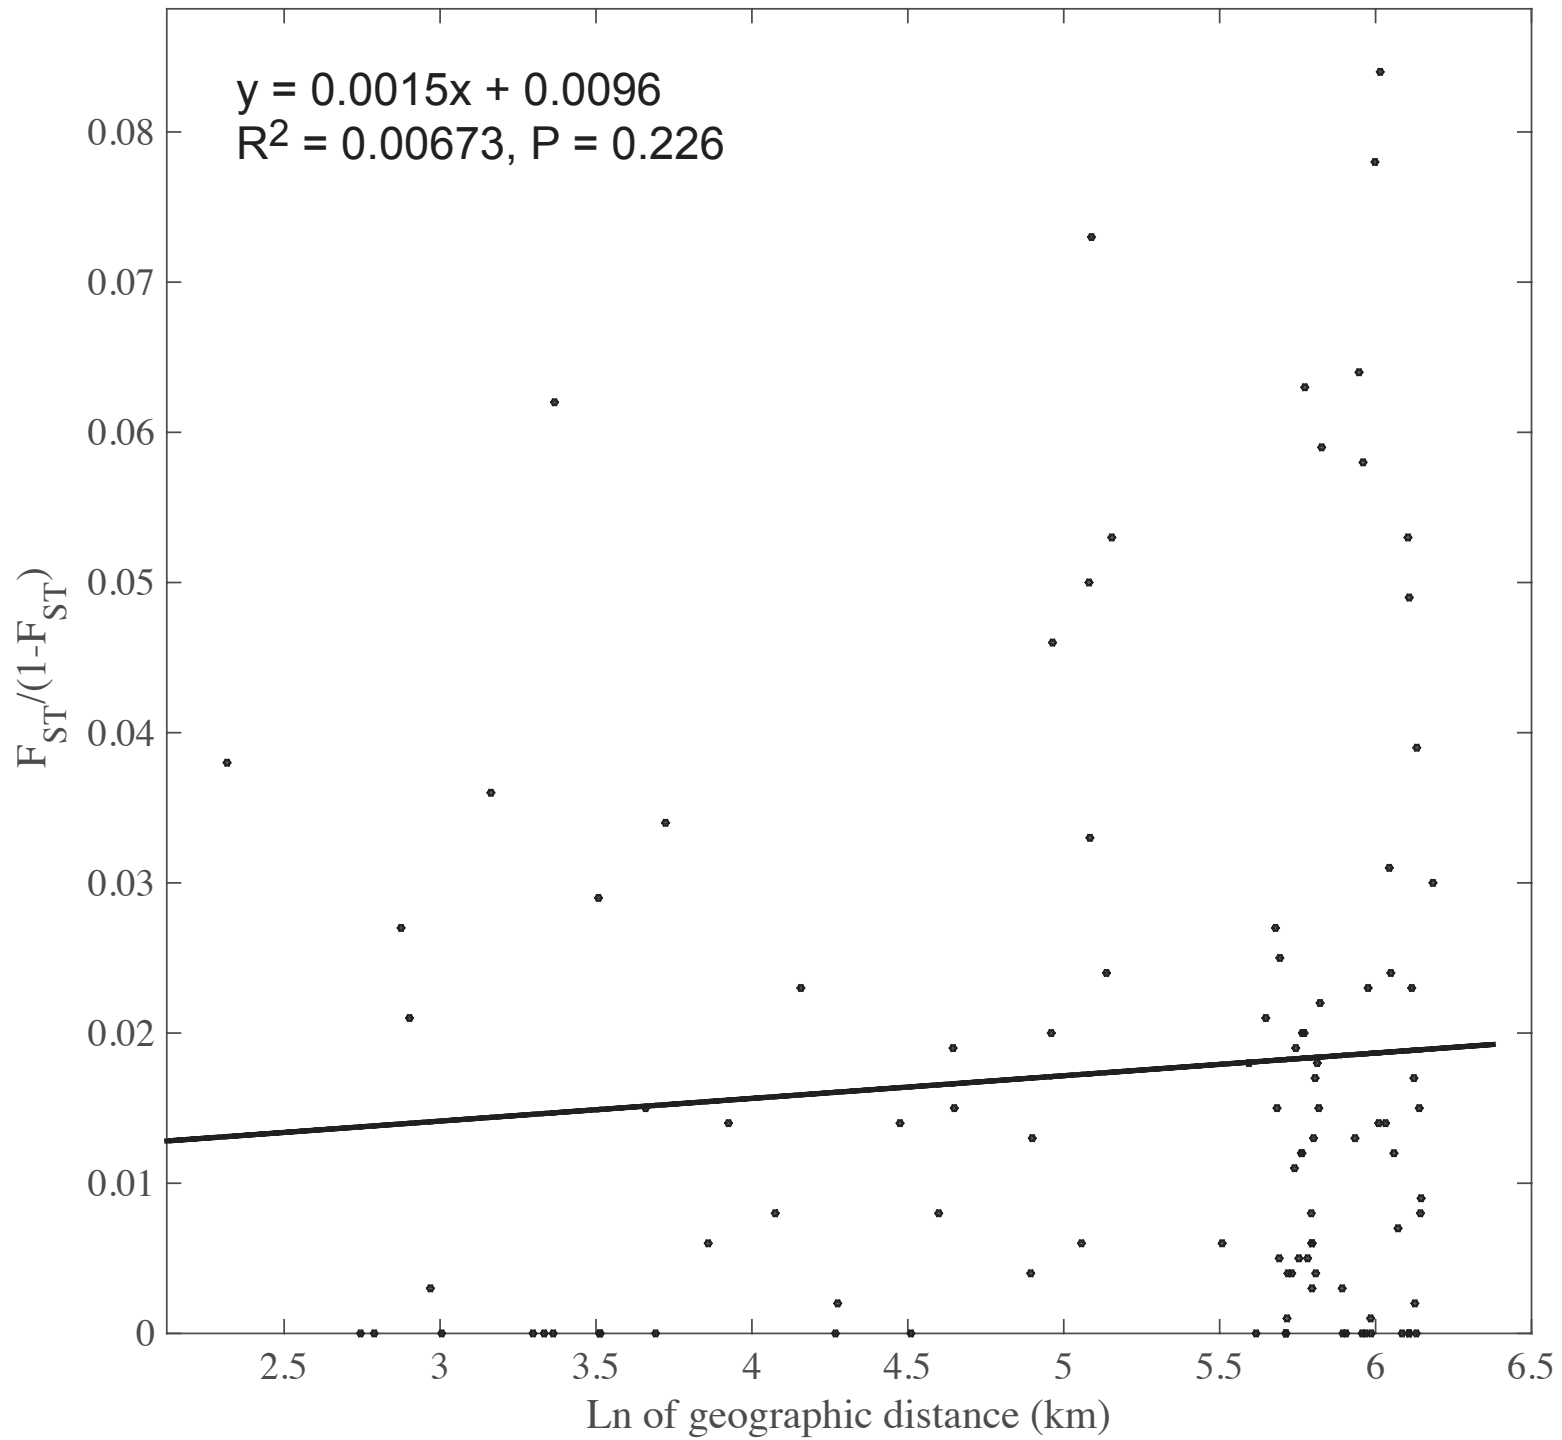

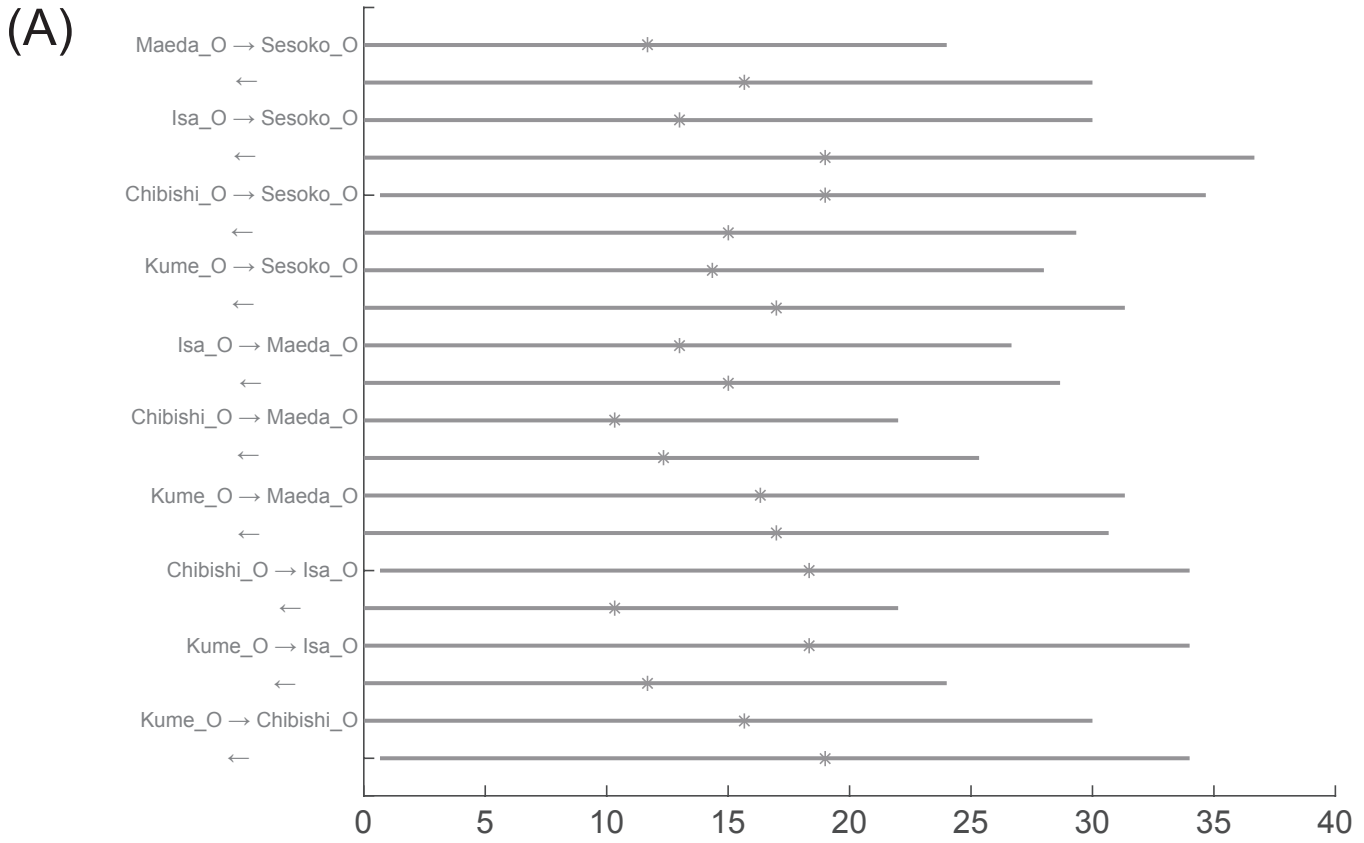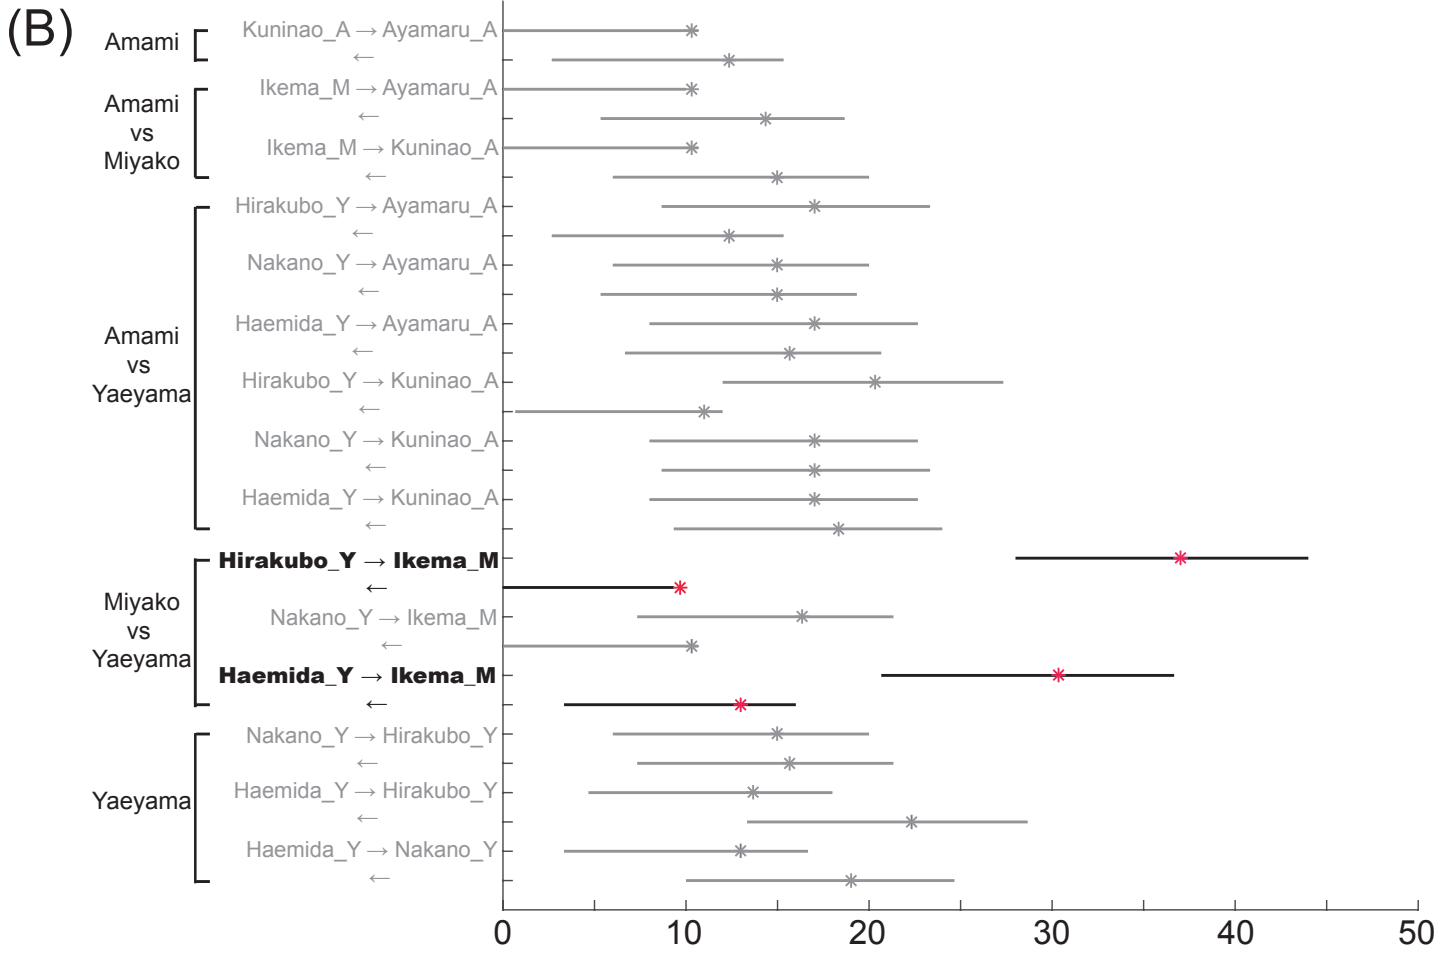



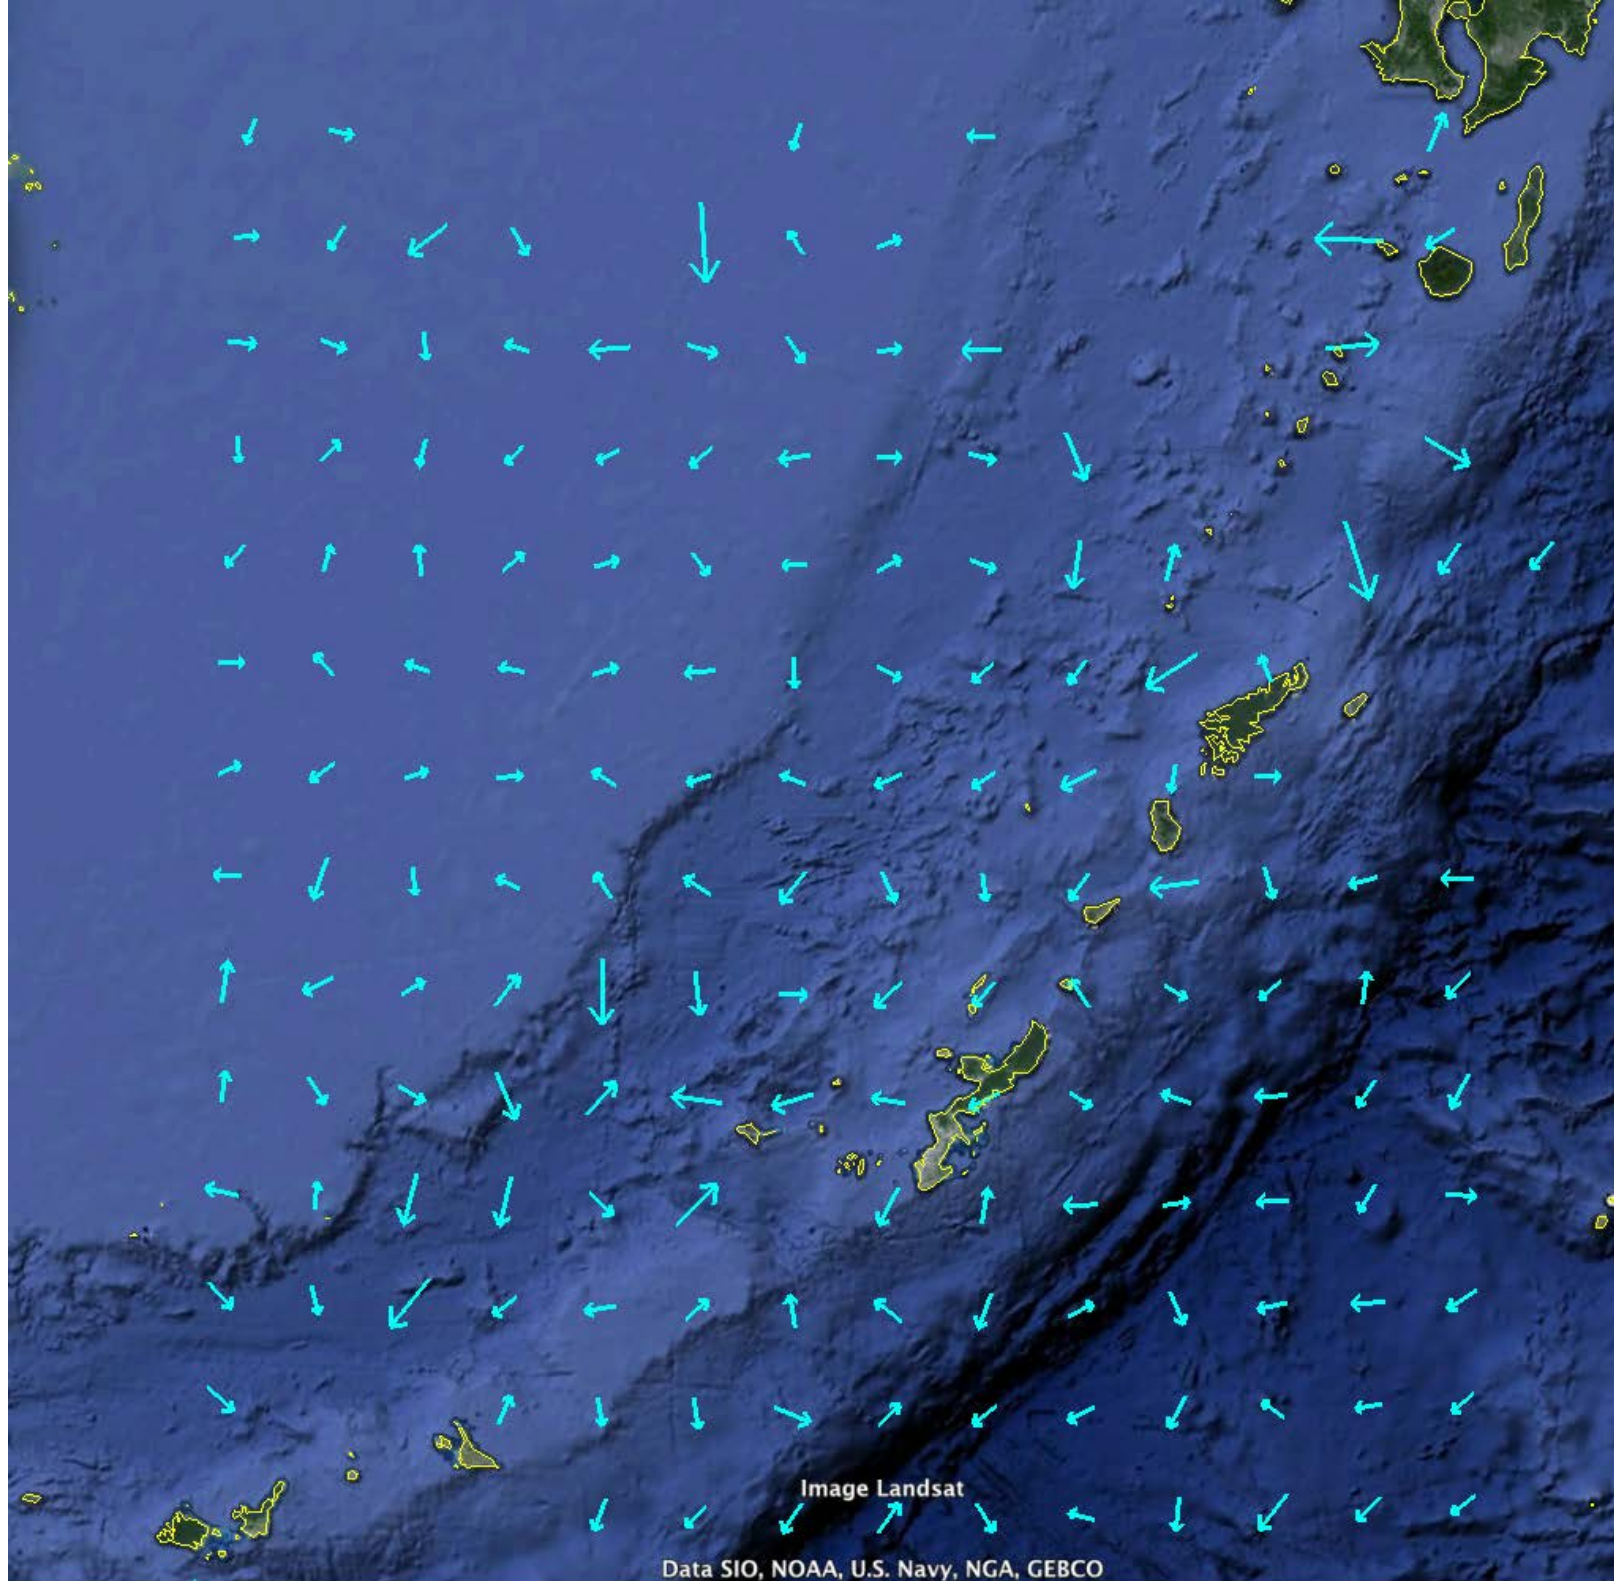

Supplement: ECE3-6-5491-s001.pdf [file ECE3-6-5491-s001.pdf]
